# Supplementary material
Source: PubMed Central journal article supplement (PMC4587464)

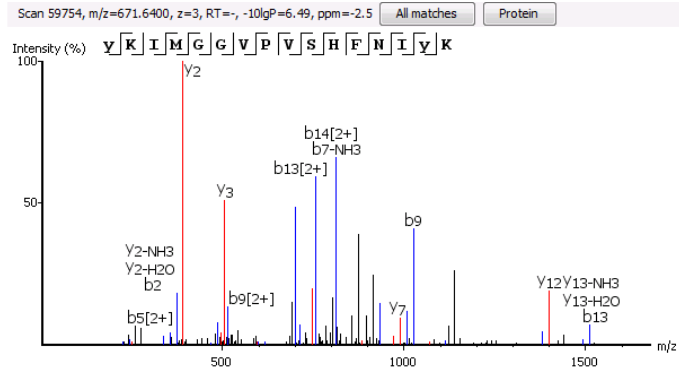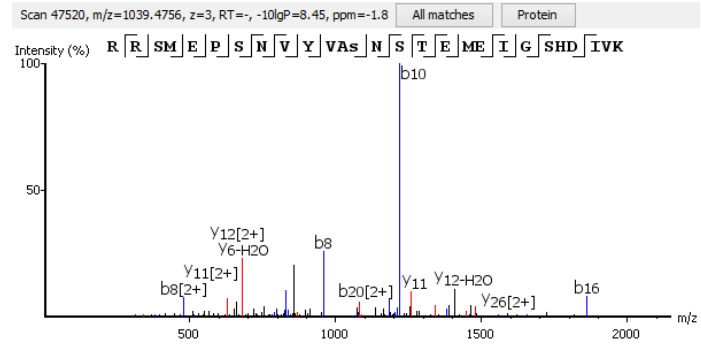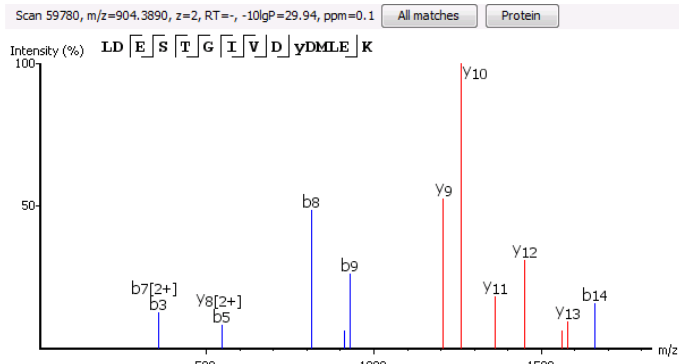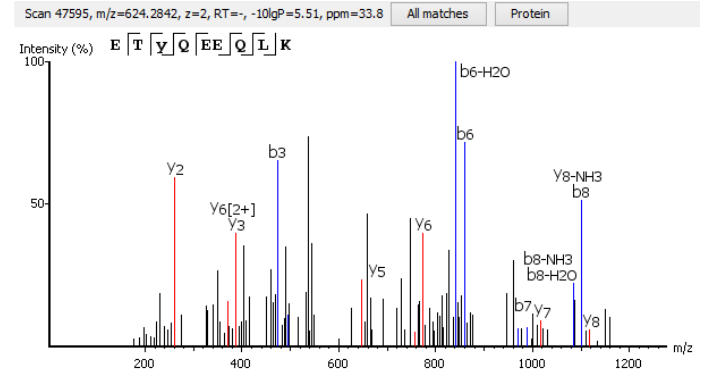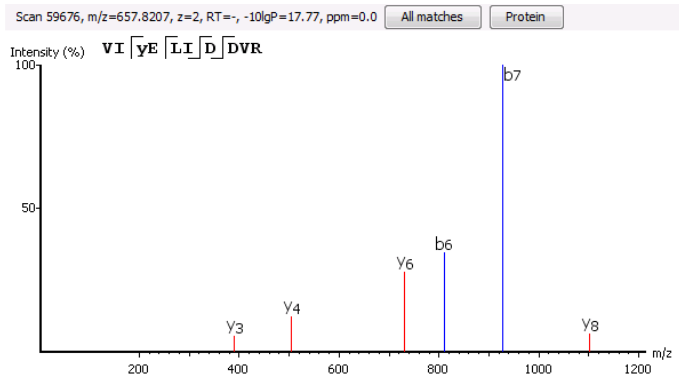

**Fig. S1: Selection of different spectra from Table 1. Presented is the fragment ion annotation.**

Supplement: supp_pp.15.00921_PP2015-00921R1_Supplemental_Figure.pdf [file supp_pp.15.00921_PP2015-00921R1_Supplemental_Figure.pdf]
